# Supplementary material for: The electrochemical lithium reactions of monoclinic ZnP2 material
Source: Royal Society of Chemistry journal article supplement (doi:10.1039/b702648j), 2007-01-01
Supplement: b702648j.pdf [file b702648j.pdf]

## **Supplementary information**

### **The Electrochemical Lithium Reactions of Monoclinic $\text{ZnP}_2$ Material**

Haesuk Hwang,<sup>1</sup> Min Gyu Kim,<sup>2</sup> Youngsik Kim,<sup>3</sup> Steve W. Martin,<sup>3</sup>  
Jaephil Cho <sup>\*1</sup>

<sup>1</sup> Department of Applied Chemistry, Kumoh National Institute of Technology, Gumi, Korea

730-701

<sup>2</sup> Beamline Research Division, Pohang Accelerator Laboratory, Pohang, Korea 790-784

<sup>3</sup>Department of Materials Science & Engineering, Iowa State University, Ames, IA50010, USA

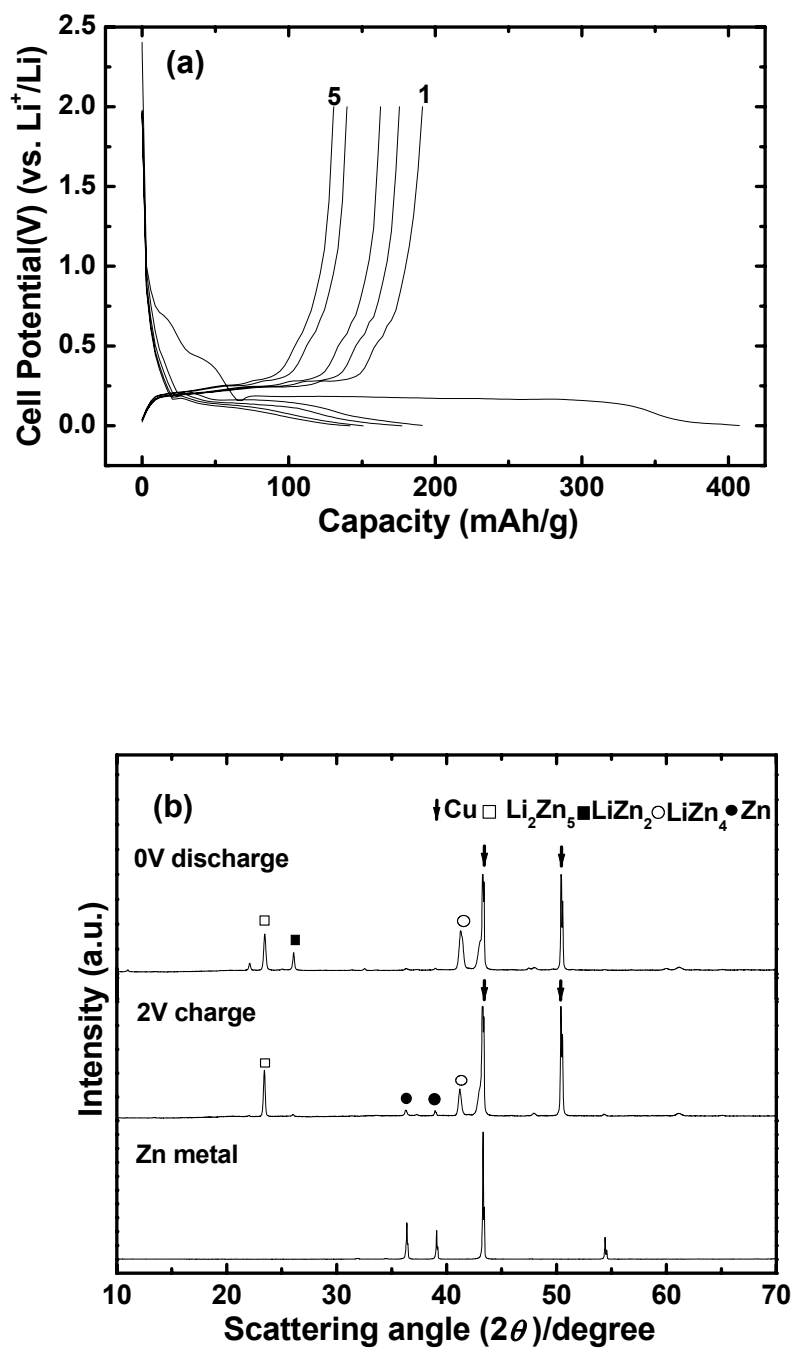

S 1. Plots of (a) voltage curves of Zn electrode between 2 and 0 V and (b) *ex situ* XRD patterns of the Zn electrode after 0 V discharge and 2 V charge.

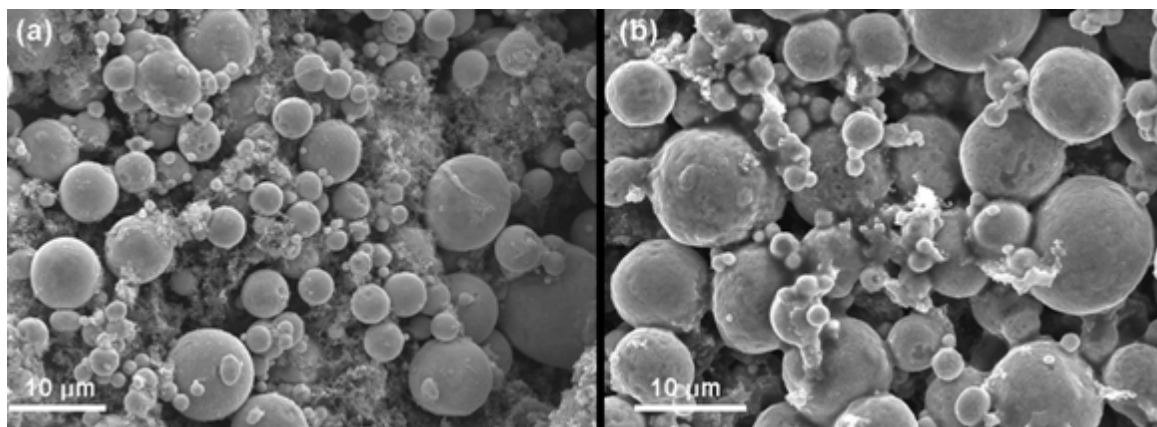

**S2.** SEM images of the Zn electrode (a) before cycling and (b) after first cycling.
